# Supplementary material
Source: MDPI journal article supplement (https://www.mdpi.com/2076-3263/12/6/229)
Supplement: s1 [file s1]

Table S1. Data Sources

| Authors                       | Location        | Rock type                   | No. Analyses<br>(Type) |
|-------------------------------|-----------------|-----------------------------|------------------------|
| Ahmed et al., 1985            | Pakistan        | Pegmatite                   | 2 (Peg)                |
| Ahmed & Hariri, 2006          | Saudi Arabia    | Skarn                       | 6 (Met)                |
| Aldahan & Morad, 1986         | Norway          | Authigenic in sandstones    | 12 (Hyd)               |
| Alderton, 1988                | England         | Secondary in granite        | 1 (Hyd)                |
| Alderton, 1988                | England         | Granite                     | 1 (Plu)                |
| Alderton, personal comm.      | England         | Secondary in granite        | 22 (Hyd)               |
| Aleinkoff et al., 2002        | Connecticut     | Orthogneiss                 | 3 (Met)                |
| Aleksandrov and Troneva, 2007 | Russia          | Skarn                       | 5 (Met)                |
| Aleksandrov and Troneva, 2007 | New South Wales | Skarn                       | 1 (Met)                |
| Aleksandrov and Troneva, 2007 | Tasmania        | Skarn                       | 7 (Met)                |
| Anand and Balakrishnan, 2011  | India           | Granitoid                   | 6 (Plu)                |
| Avchenko et al., 2012         | Russia          | Metasomatized rocks         | 17 (Met)               |
| Ayuso, 1984                   | Maine           | Granite                     | 5 (Plu)                |
| Bancroft et al., 1987         | Ontario         | Gneiss                      | 3 (Met)                |
| Barth (unpublished data)      | California      | Granodiorite, Triassic      | 134 (Plu)              |
| Baudouin and Parat, 2015      | Morocco         | Phonolite                   | 1 (SiU)                |
| Baudouin and Parat, 2015      | Germany         | Phonolite                   | 1 (SiU)                |
| Baudouin et al., 2016         | Tanzania        | Nephelinite lavas           | 2 (SiU)                |
| Bauer, 2015                   | California      | Granite                     | 216 (Plu)              |
| Bernau & Franz, 1987          | Greece          | Piemontite-albite gneiss    | 3 (Met)                |
| Bernau & Franz, 1987          | Egypt           | Calc-silicate               | 13 (Met)               |
| Bilgrami & Howie, 1960        | Pakistan        | Rodingite                   | 1 (Met)                |
| Birch, 1983                   | Victoria        | Cavities in granodiorite    | 1 (Hyd)                |
| Birch, 1985                   | Victoria        | Calc-silicate               | 1 (Met)                |
| Boles and Coombs, 1977        | New Zealand     | Authigenic in sediments     | 5 (Hyd)                |
| Boudy et al., 1997            | Western Norway  | Granulite-eclogite          | 2 (Met)                |
| Broska & Petrik, 2015         | Slovakia        | Granite                     | 7 (Plu)                |
| Broska & Petrik, 2015         | Slovakia        | Hydrothermal in granite     | 2 (Hyd)                |
| Broska et al., 2007           | Slovakia        | Tonalite                    | 11 (Plu)               |
| Broska et al., 2004           | Slovakia        | I-type granitoids           | 10 (Plu)               |
| Campbell et al., 1995         | New Mexico      | REE-U-Th veins              | 2 (Hyd)                |
| Campos et al., 2016           | Brazil          | High-K granitoid            | 3 (Plu)                |
| Cao et al., 2015              | China           | Porphyry Cu deposit         | 9 (Hyd)                |
| Carcangui et al., 1997        | Italy           | Metasomatic in granodiorite | 3 (Hyd)                |
| Carmichael, 1970              | Ontario         | Calc-silicate               | 4 (Met)                |
| Carswell et al., 1996         | China           | Eclogite                    | 8 (Met)                |
| Castelli and Rubatto, 2002    | Italy           | Metacarbonate               | 10 (Met)               |
| Castelli et al., 2007         | Italy           | Marble UHP                  | 2 (Met)                |
| Cave et al., 2015             | New Zealand     | Greywacke & argillite       | 18 (Met)               |
| Cave et al., 2015             | New Zealand     | Detrital, likely plutonic   | 3 (Plu)                |
| Cempirek et al., 2008         | Czech Republic  | Skarn                       | 9 (Met)                |
| Cerny et al., 1995            | Czech Republic  | Pegmatite                   | 10 (Peg)               |
| Chakhmouradian, 2004          | Russia          | Hydrothermal in carbonates  | 31 (Hyd)               |
| Che et al., 2013              | Western Canada  | Hornfels                    | 4 (Hyd)                |
| Che et al., 2013              | Western Canada  | Altered granodiorite        | 6 (Hyd)                |
| Che et al., 2013              | Western Canada  | Granodiorite                | 8 (Plu)                |
| Che et al., 2013              | Western Canada  | Skarn                       | 9 (Hyd)                |
| Chen et al., 2016             | China           | Metagranite                 | 7 (Met)                |
| Christiansen et al., 2015     | Utah            | Bentonites Late Jurassic    | 529 (Vol)              |
| Clark, 1974                   | Italy           | Pegmatite                   | 1 (Peg)                |
| Colombini et al., 2011        | Nevada          | Dacite mingled lava         | 5 (Vol)                |
| Colombini et al., 2011        | Nevada          | Rhyolite tuff               | 5 (Vol)                |
| Colombini et al., 2011        | Nevada          | Rhyolite lava               | 5 (Vol)                |
| Cong et al., 1995             | China           | Eclogite and UHP schist     | 15 (Met)               |
| Coombs et al., 1976           | Switzerland     | Schist                      | 2 (Met)                |
| Corlett and McIlreath, 1974   | Ontario         | Gneiss                      | 2 (Met)                |
| Cotkin, 1987                  | California      | Blueschist                  | 2 (Met)                |
| Coulson & Chambers, 1996      | Greenland       | Metasomatised basalt        | 1 (Met)                |
| Coulson & Chambers, 1996      | Greenland       | Metasomatised gneiss        | 2 (Met)                |
| Coulson & Chambers, 1996      | Greenland       | Metasomatised syenite       | 3 (Met)                |
| Coulson & Chambers, 1996      | Greenland       | Metasomatised sediment      | 4 (Met)                |
| Cundari, 1979                 | Italy           | Leucite lava - phonolite    | 1 (SiU)                |
| Dahlquist, 2001               | Argentina       | Granitoids                  | 2 (Plu)                |
| Dawson, 1998                  | Tanzania        | Nephelinite                 | 4 (SiU)                |
| Dawson & Hill, 1998           | Tanzania        | Nephelinite lava            | 5 (SiU)                |
| Dawson et al., 1995           | Tanzania        | Ijolite                     | 4 (SiU)                |
| Dawson et al., 1995           | Tanzania        | Nepheline syenite           | 5 (SiU)                |
| De Ros et al., 1994           | Brazil          | Authigenic in sandstones    | 1 (Hyd)                |
| Della Ventura et al., 1999    | Italy           | Alkali syenite lava         | 7 (SiU)                |
| Deng et al., 2015             | China           | Altered Diabase Dike        | 9 (Hyd)                |
| Deng et al., 2015             | China           | Quartz Diorite              | 14 (Plu)               |
| Deng et al., 2015             | China           | Skarn                       | 18 (Hyd)               |
| Dilles, 1984                  | Nevada          | Gabbro                      | 1 (Plu)                |
| Dilles, 1984                  | Nevada          | Granodiorite                | 1 (Plu)                |

|                                   |                  |                             |           |
|-----------------------------------|------------------|-----------------------------|-----------|
| Dilles, 1984                      | Nevada           | Diorite                     | 1 (Plu)   |
| Dilles, 1984                      | Nevada           | Quartz monzonite            | 3 (Plu)   |
| Dilles, 1984                      | Nevada           | Porphyry copper             | 6 (Hyd)   |
| Ercit et al., 2003                | NWT, Canada      | Pegmatite                   | 1 (Peg)   |
| Enami et al., 1993                | Japan            | Granitoid                   | 3 (Met)   |
| Enami et al., 1993                | California       | Meta-sediments              | 13 (Met)  |
| Endo et al., 2013                 | Japan            | Garnet amphibolite/eclogite | 1 (Met)   |
| Ernst & Dal Piaz, 1978            | Italy            | Eclogite                    | 6 (Met)   |
| Estrada et al., 2015              | Madagascar       | Skarn                       | 2 (Hyd)   |
| Exley, 1980                       | Scotland         | Granite                     | 4 (Plu)   |
| Ferguson, 1978                    | Canary Islands   | Nepheline syenite           | 1 (SiU)   |
| Flohr and Ross, 1989              | Arkansas         | Ijolite                     | 3 (SiU)   |
| Flohr and Ross, 1990              | Arkansas         | Pseudoleucite syenite       | 1 (SiU)   |
| Flohr and Ross, 1990              | Arkansas         | Nepheline syenite           | 5 (SiU)   |
| Foord et al., 1993                | Montana          | Pegmatite                   | 2 (Peg)   |
| Förster and Förster (unpub. data) | Germany          | Syenite                     | 20 (Plu)  |
| Franz & Spear, 1985               | Austria          | Eclogite                    | 21 (Met)  |
| Franzen (new BYU data)            | Utah             | Granite, Cenozoic           | 771 (Plu) |
| Fu et al., 2016                   | Yunnan, China    | Quartz syenite porphyry     | 8 (Plu)   |
| Fu et al., 2016                   | Yunnan, China    | Secondary in syenite        | 28 (Hyd)  |
| Fu et al., 2018                   | Yunnan, China    | Granite porphyry            | 12 (Plu)  |
| Fu et al., 2018                   | Yunnan, China    | Co, Mo, Au skarn            | 25 (Hyd)  |
| Gao et al., 2012                  | Dabie, China     | Metagranite ultra-HP        | 25 (Met)  |
| Gao et al., 2012                  | Dabie, China     | Relict magmatic             | 10 (Plu)  |
| Garber et al., 2017               | Norway           | Granite                     | 3 (Plu)   |
| Garber et al., 2017               | Norway           | Gneiss                      | 8 (Met)   |
| Ghent & Stout, 1984               | Canada           | Metabasite                  | 11 (Met)  |
| Giannetti & Luhr, 1983            | Italy            | Phonolite                   | 2 (SiU)   |
| Giannetti & Luhr, 1983            | Italy            | Trachyte                    | 3 (SiU)   |
| Giere & Williams, 1992            | Italy            | Hydrothermal veins in skarn | 6 (Hyd)   |
| Giere, 1992                       | Italy            | Hydrothermal veins          | 10 (Hyd)  |
| Gil (unpub. data Research Gate)   | Poland           | Jordanow nephrite           | 1 (SiU)   |
| Gilotti, 1989                     | Sweden           | Metadiabase dike            | 1 (Met)   |
| Gogoi et al., 2017                | India            | Granite                     | 19 (Plu)  |
| Gomez-Pugnaire et al. 1997        | Northern Urals   | Eclogite                    | 1 (Met)   |
| Gomez-Pugnaire et al. 1997        | Northern Urals   | Blueschist                  | 2 (Met)   |
| Grapes & Watanabe, 1992           | New Zealand      | Metagreywacke               | 24 (Met)  |
| Groat et al., 1985                | Manitoba         | Pegmatite                   | 4 (Peg)   |
| Gromet & Silver, 1983             | California       | Granite/granodiorite        | 2 (Plu)   |
| Guo et al., 2014                  | China            | Eclogite                    | 22 (Met)  |
| Hammarstrom, 1990                 | Montana          | Granite to granodiorite     | 43 (Plu)  |
| Hansen et al., 2010               | Michigan         | Low-grade metabasalts       | 3 (Met)   |
| Harlov and Förster, 2003          | Italy            | Amphibolite facies rocks    | 4 (Met)   |
| Harlov et al., 2006               | Austria          | Felsic to intermediate      | 3 (Met)   |
| Harlov et al., 2006               | Southern India   | Felsic to intermediate      | 5 (Met)   |
| Harlov et al., 2006               | Norway           | Felsic to intermediate      | 5 (Met)   |
| Harlov et al., 2006               | Italy            | Felsic to intermediate      | 5 (Met)   |
| Hartel & Pattison, 1996           | Ontario          | Mafic granulite             | 3 (Met)   |
| Hatert et al., 1996               | Belgium          | Quartz veins in gneiss      | 1 (Met)   |
| He et al., 2017                   | China            | REE-rich granites           | 2 (Plu)   |
| Helmy et al., 2004                | Egypt            | Calc-alkaline granitoids    | 14 (Plu)  |
| Henderson, 1980                   | Greenland        | Alkaline intrusion          | 1 (SiU)   |
| Henze (new BYU data)              | Utah             | Granite, Jurassic           | 488 (Plu) |
| Hole et al., 1992                 | Scotland         | Authigenic in sandstones    | 5 (Hyd)   |
| Holenyi & Annersten, 1987         | Germany          | Sanidine volcanic rock      | 1 (SiU)   |
| Holenyi & Annersten, 1987         | Sweden           | Metasedimentary rock        | 1 (Met)   |
| Horie et al., 2008                | Gabon            | Hydrothermal in tuff        | 6 (Hyd)   |
| Houzar et al., 2008               | Czech Republic   | Skarn                       | 11 (Hyd)  |
| Hu et al., 2017a                  | China            | Monzogranite                | 76 (Plu)  |
| Hu et al., 2017b                  | China            | Fe Skarn                    | 10 (Hyd)  |
| Ismail et al., 2014               | South Australia  | Cu Au deposit               | 9 (Hyd)   |
| Itaya et al., 1985                | New Caledonia    | High P schists              | 6 (Met)   |
| Ivanuk et al., 2016               | Russia           | Foidite                     | 6 (SiU)   |
| Janeczek & Sachanbinski, 1992     | Poland           | Miarolitic in pegmatite     | 3 (Hyd)   |
| Janeczek, 1996                    | Poland           | Pegmatite                   | 6 (Peg)   |
| Jensen (new BYU data)             | Utah             | Tertiary bentonite          | 50 (Vol)  |
| Jiang & Palmer, 1996              | British Columbia | Pb-Zn-Ag deposit            | 10 (Hyd)  |
| Jiang et al., 2016                | China            | Granodiorite                | 17 (Plu)  |
| Jiang et al., 2016                | China            | Diorite                     | 23 (Plu)  |
| Jung & Hellebrand, 2007           | Namibia          | Syenite                     | 8 (Plu)   |
| Kassoli-Fournaraki et al., 1995   | Greece           | Calc-silicate               | 5 (Met)   |
| Kawachi et al., 1983              | New Zealand      | Schist                      | 5 (Met)   |
| Kay, 1983                         | Alaska           | Meta quartz monzodiorite    | 2 (Met)   |
| Khalil et al., 2016               | Egypt            | Meta-volcaniclastics        | 8 (Met)   |
| Konzett & Hoinkes, 1996           | Italy            | Amphibolite                 | 2 (Met)   |
| Kowallis (new BYU data)           | Montana          | Pegmatite                   | 2 (Peg)   |
| Kowallis (new BYU data)           | Ontario          | Pegmatite                   | 2 (Peg)   |
| Kowallis (new BYU data)           | Unknown          | Unknown                     | 3 (Met)   |

|                              |                    |                               |           |
|------------------------------|--------------------|-------------------------------|-----------|
| Kowallis (new BYU data)      | Ontario            | Fenitized metasediments       | 3 (Met)   |
| Kowallis (new BYU data)      | Utah               | Cretaceous bentonite          | 4 (Vol)   |
| Kowallis (new BYU data)      | Utah               | Granite, Jurassic             | 5 (Plu)   |
| Kowallis (new BYU data)      | Australia          | Amphibolite dike              | 6 (Met)   |
| Kowallis (new BYU data)      | Ontario            | Metamorphosed pegmatite       | 6 (Met)   |
| Kowallis (new BYU data)      | New York           | Gneissic pegmatite            | 6 (Met)   |
| Kowallis (new BYU data)      | Australia          | Hydrothermal veins            | 6 (Hyd)   |
| Kowallis (new BYU data)      | Utah               | Granite, Cenozoic             | 6 (Plu)   |
| Kowallis (new BYU data)      | Nevada             | Rhyolite Tuff                 | 6 (Vol)   |
| Kowallis (new BYU data)      | Utah               | Andesite lava                 | 6 (Vol)   |
| Kowallis (new BYU data)      | Utah               | Miarolitic cavities in aplite | 46 (Hyd)  |
| Kowallis (new BYU data)      | Colorado           | Cretaceous bentonite          | 10 (Vol)  |
| Kowallis (new BYU data)      | Utah               | Precambrian biotite gneiss    | 13 (Met)  |
| Kowallis (new BYU data)      | Ontario            | Fenitized alaskite & syenite  | 15 (Met)  |
| Kowallis (new BYU data)      | Utah               | Granite laccolith, Tertiary   | 19 (Plu)  |
| Kowallis (new BYU data)      | Utah               | Hydrothermal in granite       | 45 (Hyd)  |
| Kowallis (new BYU data)      | Utah               | Dacite tuff                   | 56 (Vol)  |
| Kowallis (new BYU data)      | Utah               | Cenozoic granite near skarn   | 59 (Plu)  |
| Kowallis (new BYU data)      | Ontario            | Alaskite granite              | 65 (Plu)  |
| Kowallis (new BYU data)      | California         | Syenite, Jurassic             | 71 (Plu)  |
| Kowallis (new BYU data)      | California         | Syenite, Jurassic             | 86 (Plu)  |
| Kowallis (new BYU data)      | California         | Granite, Cretaceous           | 117 (Plu) |
| Kowallis (new BYU data)      | Colorado           | Dacite tuff                   | 118 (Vol) |
| Kowallis (new BYU data)      | Ontario            | Fenitized gneiss              | 139 (Met) |
| Kowallis (new BYU data)      | California         | Granite, Jurassic             | 162 (Plu) |
| Kowallis (new BYU data)      | California         | Granite, Jurassic             | 185 (Plu) |
| Kowallis (new BYU data)      | Nevada             | Rhyolite tuff                 | 203 (Vol) |
| Kowallis (new BYU data)      | Nevada             | Rhyolite tuff                 | 407 (Vol) |
| Kowallis et al., 2001        | Utah               | Bentonites Middle Jurassic    | 204 (Vol) |
| Kretz, 2005                  | Quebec             | Nepheline syenite             | 1 (SiU)   |
| Krmíček et al., 2011         | Czech Republic     | Lamproitic dike               | 4 (Plu)   |
| Laurent et al., 2017         | South Africa       | Granite and granodiorite      | 66 (Plu)  |
| Lecuyer et al., 1995         | Unknown            | Unclassified metamorphic      | 2 (Met)   |
| Liferovich & Mitchell, 2005  | Russia             | Hydrothermal veins            | 14 (Hyd)  |
| Liu et al., 2018             | China              | Skarn                         | 56 (Hyd)  |
| Lopez Sanchez-Vizcaino, 1997 | Spain              | Calc-silicate                 | 5 (Met)   |
| Luhr et al., 1984            | Mexico             | Trachyandesite                | 1 (SiU)   |
| Lussier et al., 2009         | Norway             | Pegmatite                     | 2 (Peg)   |
| Makanjuola and Howie, 1972   | France             | Blueschist                    | 4 (Met)   |
| Markl and Piazzolo, 1999     | Antarctica         | Calcsilicate                  | 17 (Met)  |
| Marsh and Kelly, 2017        | Ontario            | Metabasite                    | 2 (Met)   |
| McColl & Petersen, 1990      | Australia          | Hydrothermal                  | 1 (Hyd)   |
| McLeod et al., 2011          | Scotland           | Granite                       | 10 (Plu)  |
| McLeod et al., 2011          | Scotland           | Diorite dike                  | 17 (Plu)  |
| McLeod et al., 2011          | Scotland           | Diorite                       | 22 (Plu)  |
| McLeod et al., 2011          | Scotland           | Veined diorite                | 22 (Plu)  |
| McLeod et al., 2011          | Scotland           | Granite-diorite hybrid        | 31 (Plu)  |
| McLeod et al., 2011          | Scotland           | Vesicular diorite             | 48 (Plu)  |
| Mevel, 1981                  | Vema Fracture Zone | Metabasalt                    | 1 (Met)   |
| Middleton et al., 2013       | France             | Monzogranite                  | 2 (Plu)   |
| Mikhailova et al., 2017      | Russia             | Peralkaline granite           | 1 (Plu)   |
| Mohammad & Maekawa, 2008     | Iraq               | Metarodigite                  | 22 (Met)  |
| Moore & McStay, 1990         | South Africa       | Plag-qtz gneiss               | 1 (Met)   |
| Morad, 1988                  | Norway             | Authigenic in sandstones      | 12 (Hyd)  |
| Morad et al., 1990           | Sweden             | Hydrothermal in granite       | 4 (Hyd)   |
| Morgante, 1943               | Unknown            | Pegmatite                     | 1 (Peg)   |
| Mosher (new BYU data)        | Utah               | Mafic enclaves in granite     | 171 (Plu) |
| Mrazek and Vrana, 1984       | Czechoslovakia     | Pegmatite in skarn            | 1 (Peg)   |
| Nakada, 1991                 | Andes Mountains    | Dacite                        | 7 (Vol)   |
| Ng et al., 2016              | Myanmar            | Omphacitite & jadeite         | 11 (Met)  |
| Nielsen, 1979                | Greenland          | Syenite                       | 2 (Plu)   |
| Nijland et al., 1993         | Norway             | Metabasite                    | 1 (Met)   |
| Nishiyama, 1990              | Japan              | Metabasite                    | 2 (Met)   |
| Oberti et al., 1991          | Various            | Eclogite, amphibolite         | 4 (Met)   |
| Ogasawara et al., 2002       | Kazakhstan         | Marble                        | 6 (Met)   |
| Olin & Wolff, 2012           | Canary Islands     | Phonolite                     | 2 (SiU)   |
| Pan & Fleet, 1992            | Ontario            | Green-mica schist             | 10 (Met)  |
| Pan & Fleet, 1996            | Unknown            | Granulite calc-silicate       | 1 (Met)   |
| Pan et al., 1993             | Brazil             | Hydrothermal                  | 1 (Hyd)   |
| Pan et al., 1993             | India              | Pegmatite                     | 2 (Peg)   |
| Pan et al., 1993             | Ontario            | Pegmatite                     | 2 (Peg)   |
| Pan et al., 1993             | Manitoba           | Granite                       | 2 (Plu)   |
| Pan et al., 1993             | Ontario            | Pyroxenite                    | 3 (Met)   |
| Paslick et al., 1996         | Tanzania           | Foidite                       | 6 (SiU)   |
| Paterson & Stephens, 1992    | Scotland           | Granodiorite                  | 14 (Plu)  |
| Paterson et al., 1989        | Scotland           | Appinite                      | 13 (Plu)  |
| Paul et al., 1981            | Unknown            | Pegmatite                     | 3 (Peg)   |
| Pauly, 1948                  | Greenland          | Skarn                         | 2 (Met)   |

|                                   |                  |                               |           |
|-----------------------------------|------------------|-------------------------------|-----------|
| Pedersen, 1979                    | Greenland        | Shale buchite xenolith        | 1 (Met)   |
| Perseil & Smith, 1995             | Italy            | Quartzite (eclogite)          | 20 (Met)  |
| Peterson, 1989                    | Kenya            | Nephelinite lava              | 1 (SiU)   |
| Piuzana et al., 2008              | Brazil           | Gneiss                        | 10 (Met)  |
| Pilmer, 1984                      | New South Wales  | Skarn                         | 1 (Hyd)   |
| Radvenec, 1994                    | Slovakia         | Metagranite                   | 1 (Met)   |
| René, 2008                        | Czech Republic   | Metabasite                    | 6 (Met)   |
| René, 2010                        | Czech Republic   | Secondary in granite          | 6 (Hyd)   |
| Robinson et al., 2015             | Tibet            | Chromitite in ophiolite       | 4 (Met)   |
| Rossetti et al., 2017             | Turkey           | Orthogneiss                   | 8 (Met)   |
| Rossetti et al., 2017             | Turkey           | Granodiorite                  | 9 (Plu)   |
| Russell et al., 1994              | British Colombia | Metasomatised pegmatite       | 21 (Peg)  |
| Sawka & Chappell, 1988            | California       | Granodiorite                  | 4 (Plu)   |
| Schiffman et al., 1985            | Mexico           | Authigenic                    | 3 (Hyd)   |
| Segvic et al., 2016               | Croatia          | Amphibolite                   | 8 (Met)   |
| Seifert, 2005                     | Germany          | Secondary in lamprophyre      | 2 (Hyd)   |
| Seifert et al., 2009              | Germany          | Secondary in granite          | 2 (Hyd)   |
| Shau et al., 1991                 | Taiwan           | Orthogneiss                   | 3 (Met)   |
| Shellnut and Iizuka, 2011         | China            | A-type granites               | 8 (Plu)   |
| Smith et al., 2009                | Sweden           | Cu Au deposit                 | 15 (Hyd)  |
| Smith, 1970                       | Cameroon         | Nephelinite lava              | 5 (SiU)   |
| Sobolev and Shatsky, 1990         | Russia           | Biotite gneiss                | 1 (Met)   |
| Stephenson & Cook, 1997           | East Antarctica  | Calc-silicate granulite       | 12 (Met)  |
| Tararin et al., 2011              | Russia           | Schist                        | 14 (Met)  |
| Trzcinski et al., 1984            | New Brunswick    | Metabasite                    | 1 (Met)   |
| Tulloch, 1979                     | New Zealand      | Metagranodiorite              | 2 (Met)   |
| Uher et al., 1998                 | Slovakia         | Pegmatite                     | 5 (Peg)   |
| Vakh et al., 2012                 | Russia           | Metasomatized rocks           | 11 (Hyd)  |
| van Marcke de Lummen, 1986        | England          | Skarn                         | 1 (Hyd)   |
| van Panhuys-Sigler & Trewin, 1990 | Scotland         | Authigenic in sandstones      | 6 (Hyd)   |
| Viana da Cunha et al., 2016       | Brazil           | Precambrian metagranite       | 19 (Met)  |
| Vogt & Flower, 1989               | Malaysia         | Hornblende quartz monzonite   | 2 (Plu)   |
| Vuorinen and Hälenius, 2005       | Sweden           | Melteigite                    | 3 (SiU)   |
| Walters, 2016                     | Nepal            | Metasediments, calc-silicates | 22 (Met)  |
| Wang et al., 2001                 | China            | I-type granites               | 6 (Plu)   |
| Wang et al., 2001                 | China            | A-type granites               | 3 (Plu)   |
| Winkel (new BYU data)             | Arkansas         | Nepheline Syenite             | 7 (SiU)   |
| Winkel (new BYU data)             | California       | Tuff, Jurassic                | 8 (Vol)   |
| Winkel (new BYU data)             | California       | Altered Tuff                  | 16 (Hyd)  |
| Winkel (new BYU data)             | Arkansas         | Ijolite Xenolith              | 17 (SiU)  |
| Winkel (new BYU data)             | Arkansas         | Nepheline syenite             | 42 (SiU)  |
| Winkel (new BYU data)             | Ontario          | Pegmatite in Gneiss           | 42 (Peg)  |
| Winkel (new BYU data)             | Arkansas         | Jacupirangite                 | 120 (SiU) |
| Winkel (new BYU data)             | Germany          | Phonolite Tuff                | 120 (SiU) |
| Winkel (new BYU data)             | Macedonia        | Pegmatite                     | 160 (Peg) |
| Winkel (new BYU data)             | Ontario          | Fenitized Gneiss              | 229 (Met) |
| Wintsch and Yi, 2002              | Connecticut      | Gneiss                        | 4 (Met)   |
| Wolff, 1984                       | Canary Islands   | Phonolite Lava                | 1 (SiU)   |
| Woolley et al., 1992              | Malawi           | Nepheline syenite             | 4 (SiU)   |
| Wu et al., 2016                   | China            | Lujavrite and Nephelinite     | 105 (SiU) |
| Xie et al., 2006                  | China            | A-type Granites               | 10 (Plu)  |
| Xu et al., 2015                   | China            | Barren Porphyry               | 6 (Plu)   |
| Xu et al., 2015                   | China            | Cu Porphyry                   | 15 (Plu)  |
| Yau et al., 1984                  | New Jersey       | Marble                        | 1 (Met)   |
| Ye et al., 2002                   | China            | Garnet clinopyroxenite        | 13 (Met)  |
| Ying & Pu, 2005                   | Queensland       | Albitized amphibolite         | 10 (Met)  |
| Ying & Pu, 2005                   | Queensland       | Granite and diorite           | 7 (Plu)   |
| Zhang et al., 2016                | Tibet            | Amphibolite                   | 6 (Met)   |
| Zucali, 2011                      | Italy            | Eclogite                      | 2 (Met)   |

Note: Analysis types refer to the generic type of rock from which the titanites were extracted and include volcanic (Vol), plutonic (Plu), metamorphic (Met), silica-undersaturated (SiU), hydrothermal (Hyd), and pegmatitic (Peg).
